# Supplementary material
Source: HighWire-hosted journal article supplement (https://www.jrheum.org/highwire/filestream/39650/field_highwire_adjunct_files/0/200286transcript.pdf)
Supplement: 200286transcript.pdf [file 200286transcript.pdf]

## **Evaluation of Bone Erosions in Rheumatoid Arthritis: The Ultrasound Score for Erosions Versus the Modified Sharp/van der Heijde Score for Erosions**

Julien Grosse, Edem Allado, Éliane Albuissou, Audrey Pierreisnard, Marion Couderc, Isabelle Chary-Valckenaere and Damien Loeuille

The Journal of Rheumatology March 2021; <https://doi.org/10.3899/jrheum.200286>

Hi, this is Julien Grosse from the rheumatology department in Nancy in France.

I'm glad to share the main results of our article entitled "Evaluation of Bone Erosions in Rheumatoid Arthritis: The Ultrasound Score for Erosions Versus the Modified Sharp/van der Heijde Score for Erosions".

The main objective was to evaluate the relationship between the 2 scores.

One hundred eight patients with rheumatoid arthritis (RA) were included. On radiography, the Sharp score was evaluated by 2 or 3 blinded readers.

On ultrasonography, erosions were scored on 6 bilateral joints. Let me show you a little demonstration. On metacarpophalangeal 2, 3, and 5 on dorsal/lateral/palmar facets; on metatarsophalangeal joints 2, 3, and 5 on dorsal/lateral/plantar facets) with a 4-point scale to calculate our score called the ultrasound score for erosions.

The main results are that the Pearson correlation was good and the agreement illustrated by a Bland-Altman plot was excellent (91%) between the 2 scores, which were complementary in detecting erosions.

In conclusion, our ultrasound score seems to be a valuable tool for assessing erosive damage in RA.

Thank you very much for your attention, and please do check out our full article at *The Journal of Rheumatology*.
